# Supplementary material for: miR-140-5p Attenuates Hypoxia-Induced Breast Cancer Progression by Targeting Nrf2/HO-1 Axis in a Keap1-Independent Mechanism
Source: Cells. 2021 Dec 22;11(1):12. doi: 10.3390/cells11010012 (PMC8750786; doi:10.3390/cells11010012)
Supplement: Supplementary file 1 [file cells-11-00012-s001.zip › cells-1418549-supplementary.pdf]

# miR-140-5p Attenuates Hypoxia-Induced Breast Cancer Progression by Targeting Nrf2/HO-1 Axis in a Keap1-Independent Mechanism

Megharani Mahajan and Sandhya Sitasawad \*

Redox Biology Lab, National Centre for Cell Science (NCCS), Pune 411007, India;  
mmegha@nccs.res.in or meghanandgaon@gmail.com

\* Correspondence: ssitaswad@nccs.res.in; Tel.: +20-25-708-148

## Supplementary materials and methods

### Antibody staining by FACS

The Hif-1 $\alpha$  level was determined by flow cytometry as described previously (1).

### Transfection

Transient transfection of the shHif-1 $\alpha$  vector was performed as reported previously (2).

### Adhesion assay

Cell-ECM (Extracellular matrix adhesion) was analyzed by performing adhesion assay as reported previously (3).

### Cell cycle analysis

Cell cycle analysis was performed using flow cytometry as described previously (4).

## References

1. Dasgupta, Aparajita, et al. "AECHE-1 targets breast cancer progression via inhibition of metastasis, prevention of EMT and suppression of Cancer Stem Cell characteristics." *Scientific reports* 6.1 (2016): 1-13, <https://doi.org/10.1038/srep38045>.
2. Tian, Nianxiu, et al. "Emodin mitigates podocytes apoptosis induced by endoplasmic reticulum stress through the inhibition of the PERK pathway in diabetic nephropathy." *Drug Design, Development and Therapy* 12 (2018): 2195, <https://doi.org/10.2147/dddt.s167405>.
3. Penna, Elisa, et al. "microRNA-214 contributes to melanoma tumour progression through suppression of TFAP2C." *The EMBO journal* 30.10 (2011): 1990-2007, <https://doi.org/10.1038/emboj.2011.102>.
4. Yu, Junhui, et al. "MicroRNA-181a promotes cell proliferation and inhibits apoptosis in gastric cancer by targeting RASSF1A." *Oncology reports* 40.4 (2018): 1959-1970, <https://doi.org/10.3892/or.2018.6632>.

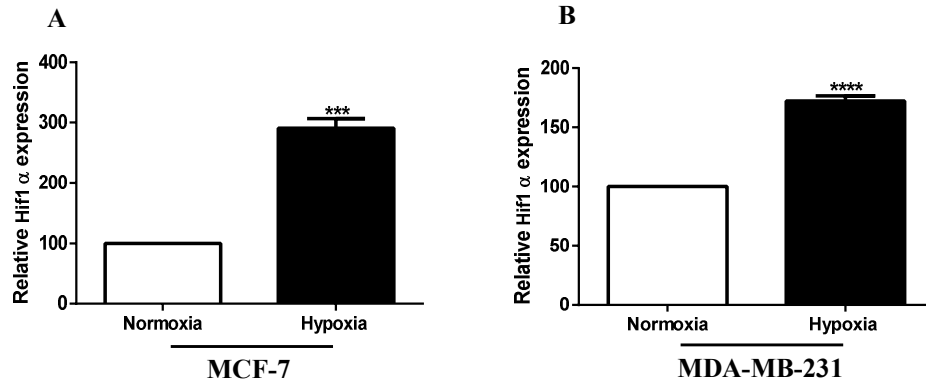

**Figure S1. Hypoxia induces a change in Hif-1α protein level.**

BC cells were exposed to hypoxia for 48 h. Hif1α level was measured by flow cytometry in MCF-7 (A) and MDA-MB-231 (B). Results were represented as relative fluorescence intensity. Error bars indicate mean  $\pm$  SEM (n = 3). Student's t-tests were used to compare the means of two groups. \*\*\*P < 0.001 and \*\*\*\*P < 0.0001 compared to Normoxia.

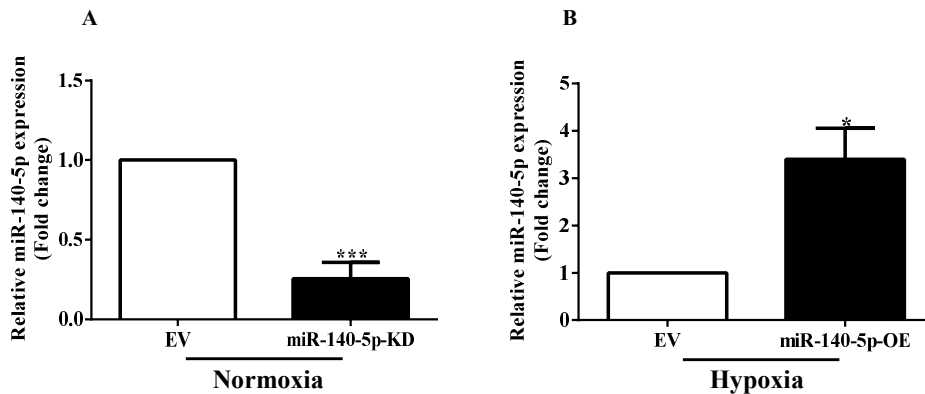

**Figure S2. Confirmation of miR-140-5p knockdown and overexpression.** MDA-MB-231 cells were transduced with lentivirus containing miR-140-5p knockdown or overexpression constructs. The efficiency of miR-140-5p knockdown under normoxia (A) or overexpression under hypoxia (B) was analyzed by measuring its relative expression by qRT-PCR. Error bars indicate mean  $\pm$  SEM (n = 3). Student's t-tests were used to compare the means of two groups. \*P < 0.05 and \*\*\*P < 0.001 compared to EV.

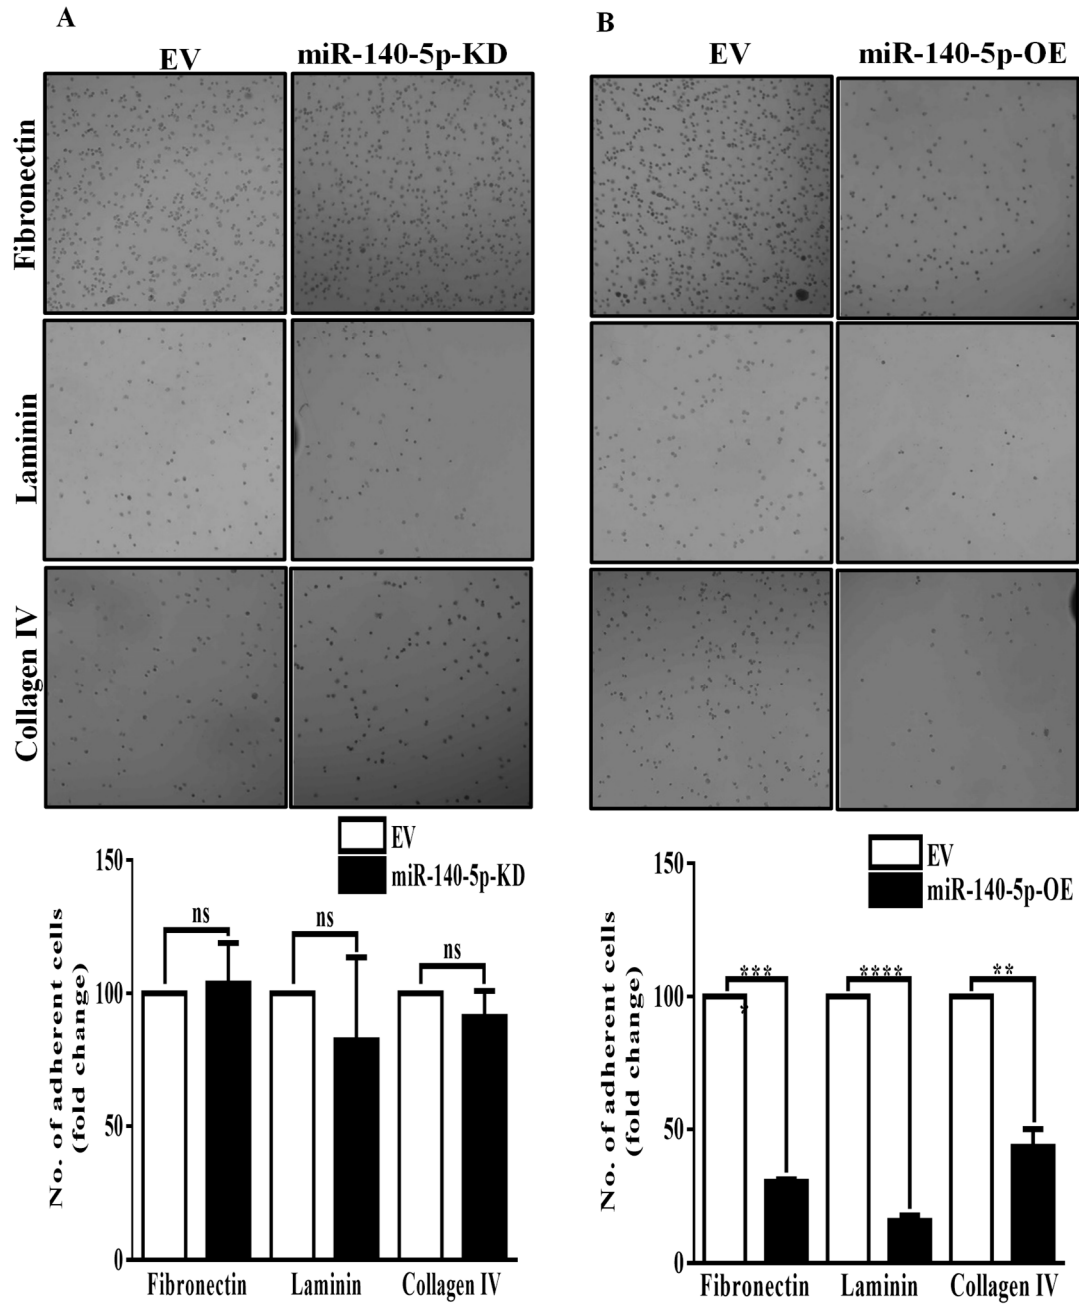

**Figure S3. miR-140-5p modulates cell adhesion.** Cell adhesion assay of MDA-MB-231 cells adhering to Fibronectin, Laminin, or Collagen IV. (A) miR-140-5p knockdown under normoxia or (B) miR-140-5p overexpression under hypoxia along with their EV control. Error bars indicate mean  $\pm$  SEM (n = 3). Student's t-tests were used to compare the means of two groups. ns: not significant, \*\*P<0.01, \*\*\*P < 0.001 and \*\*\*\*P<0.0001 compared to EV.

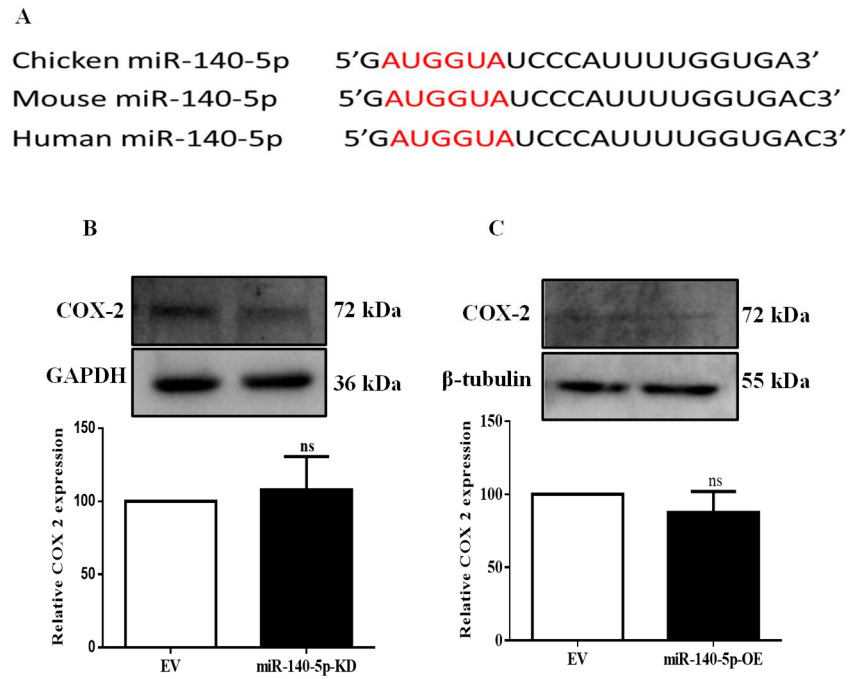

**Figure S4. Effect of miR-140-5p expression on angiogenic marker.** (A) Schematic representation of conserved seed sequence of miR-140-5p across different species. (B) Representative western blot images and its densitometry of COX-2, showing the non-significant change in the level in miR-140-5p knockdown under normoxia (B) or overexpression under hypoxia (C). GAPDH and  $\beta$ -tubulin were used as endogenous controls. Error bars indicate mean  $\pm$  SEM ( $n = 3$ ). Student's t-tests were used to compare the means of two groups. ns: not significant.

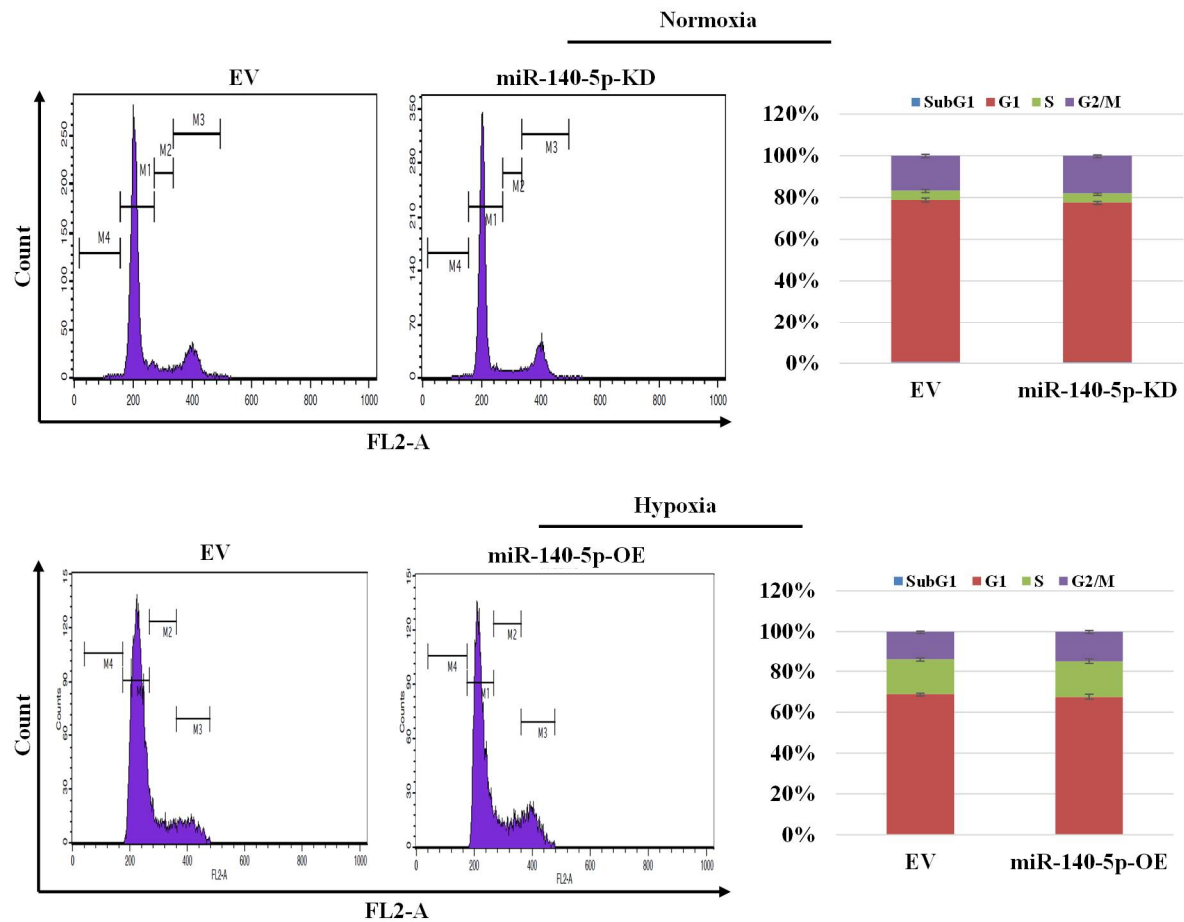

**Figure S5. Effect of miR-140-5p expression on cell cycle.** Effect of miR-140-5p expression on different cell cycle phases in MDA-MB-231 cells with stable miR-140-5p-KD under normoxia (A) or miR-140-5p-OE under hypoxia (B) were assessed by flow cytometry. Representative graphs from three independent experiments were shown. Error bars indicate mean  $\pm$  SEM (n = 3).

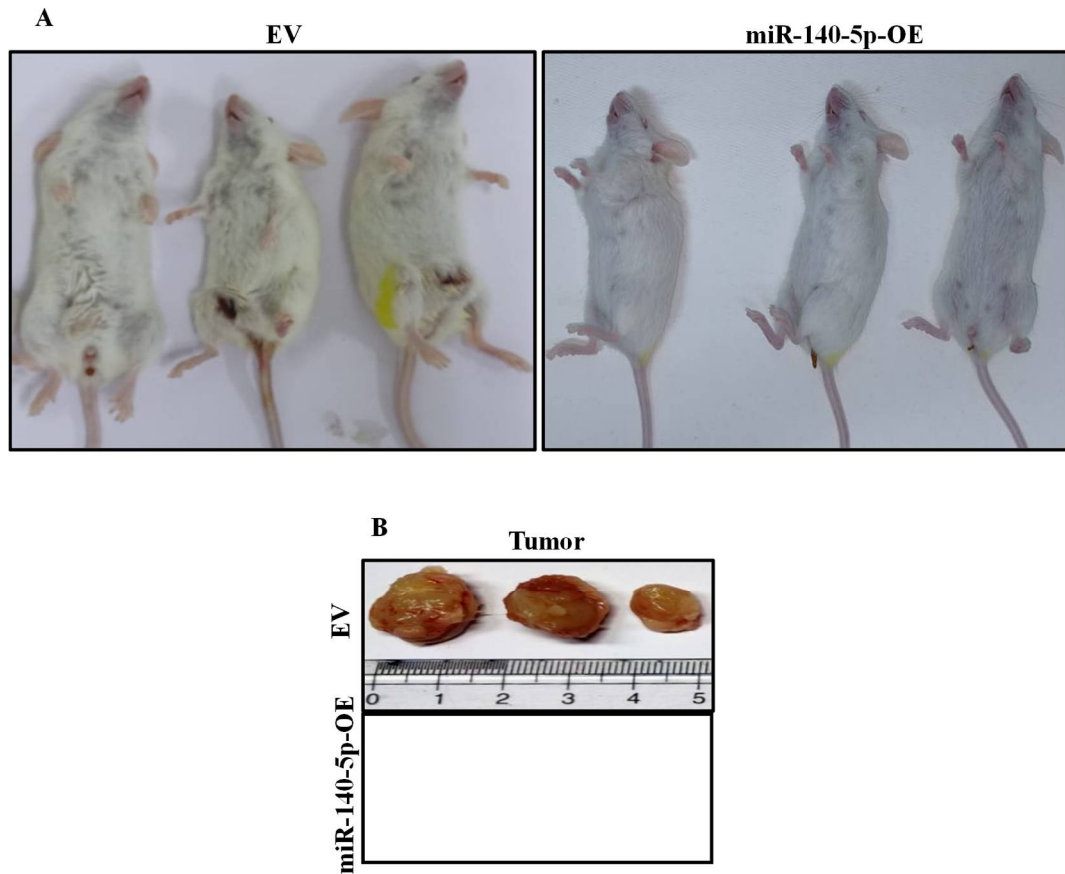

**Figure S6. Tumorigenicity assay in mouse xenograft model.** (A) MDA-MB-231 cells with EV or miR-140-5p-OE were subcutaneously injected into the mammary fat pad of female SCID mice. (B) Representative image of tumors from EV group. Since tumor growth was potently suppressed, mice in the miR-140-5p-OE group did not develop any tumor. n=3.

**Table S1. Prediction of novel miRNAs targeting Nrf2 mRNA**

| Target Scan    | miRDB           | miRSystem       |
|----------------|-----------------|-----------------|
| hsa-miR-27-3p  | hsa-miR-144-3p  | hsa-miR-101-3p  |
| hsa-miR-128-3p | hsa-miR-3680-3p | hsa-miR-106b-5p |
| hsa-miR-142-5p | hsa-miR-582-5p  | hsa-miR-128-3p  |
| hsa-miR-153-3p | hsa-miR-212-3p  | hsa-miR-129-5p  |
| hsa-miR-144-3p | hsa-miR-132-3p  | hsa-miR-132-3p  |
| hsa-miR-140-5p | hsa-miR-6854-5p | hsa-miR-140-5p  |
|                | hsa-miR-340-5p  | hsa-miR-142-3p  |
|                | hsa-miR-153-3p  | hsa-miR-142-5p  |
|                | hsa-miR-450b-5p | hsa-miR-144-3p  |
|                | hsa-miR-500a-5p | hsa-miR-153-3p  |
|                | hsa-miR-5590-3p | hsa-miR-186-5p  |
|                | hsa-miR-7-1-3p  | hsa-miR-199a-3p |
|                | hsa-miR-142-5p  | hsa-miR-199b-3p |
|                | hsa-miR-140-5p  | hsa-miR-20a-5p  |
|                | hsa-miR-7-2-3p  | hsa-miR-20b-5p  |
|                |                 | hsa-miR-212-3p  |
|                |                 | hsa-miR-27a-3p  |
|                |                 | hsa-miR-27b-3p  |
|                |                 | hsa-miR-28-5p   |

**Table S2. Primer sequences used for generation of vector and qPCR**

| Gene name        | Primer orientation | Sequence (5'→3')                                    |
|------------------|--------------------|-----------------------------------------------------|
| miR-142-5p       | Stem loop          | GTCGTATCCAGTGCAGGGTCCGAGGTATTTCGCACTGGATACGACAGTAGT |
| miR-142-5p       | Forward            | CCATAAAGTAGAAAGCACTAC                               |
| miR-153-3p SL    | Stem loop          | GTCGTATCCAGTGCAGGGTCCGAGGTATTTCGCACTGGATACGACGATCAC |
| miR-153-3p       | Forward            | CTTGCAATAGTCACAAAAGTGA                              |
| miR-144-3p SL    | Stem loop          | GTCGTATCCAGTGCAGGGTCCGAGGTATTTCGCACTGGATACGACAGTACA |
| miR-144-3p       | Forward            | CTACAGTATAGATGATGTACT                               |
| miR-140-5p       | Stem loop          | GTCGTATCCAGTGCAGGGTCCGAGGTATTTCGCACTGGATACGACCTACCA |
| miR-140-5p       | Forward            | GTATACCAGTGGTTTTACCT                                |
| miRNA            | U/R                | CCAGTGCAGGGTCCGAGGTA                                |
| U6               | Forward            | CTCGCTTCGGCAGCACA                                   |
| U6               | Reverse            | AACGCTTCACGAATTTGCGT                                |
| Nrf2             | Forward            | GAGAGCCCAGTCTTCATTGC                                |
| Nrf2             | Reverse            | TGCTCAATGTCCTGTTGCAT                                |
| HO-1             | Forward            | CTGGAGGAGGAGATTGAGCG                                |
| HO-1             | Reverse            | ATGGCTGGTGTGTAGGGGAT                                |
| Keap1            | Forward            | TACGATGTGGAAACAGAGACGTGGACTTTCGTA                   |
| Keap1            | Reverse            | TCAACAGGTACAGTTCTGGTCAATCTGCTT                      |
| Twist            | Forward            | GCCAGGTACATCGACTTCCTCT                              |
| Twist            | Reverse            | TCCATCCTCCAGACCGAGAAGG                              |
| Snail            | Forward            | GCTGCAGGACTCTAATCCAGA                               |
| Snail            | Reverse            | ATCTCCGAGGTGGGATG                                   |
| Slug             | Forward            | TGGTTGCTTCAAGGACACAT                                |
| Slug             | Reverse            | GTTGCAGTGAGGGCAAGAA                                 |
| Vimentin         | Forward            | AGGCAAAGCAGGAGTCCACTGA                              |
| Vimentin         | Reverse            | ATCTGGCGTTCCAGGGACTCAT                              |
| $\beta$ -catenin | Forward            | CACAAGCAGAGTGCTGAAGGTG                              |
| $\beta$ -catenin | Reverse            | GATTCCTGAGAGTCCAAAGACAG                             |

|                  |         |                                                                                                                                          |
|------------------|---------|------------------------------------------------------------------------------------------------------------------------------------------|
| GAPDH            | Forward | CCTGCACCACCAACTGCTTAG                                                                                                                    |
| GAPDH            | Reverse | TGAGTCCTTCCACGATACCAA                                                                                                                    |
| Nrf2 3'UTR (WT)  | Forward | TCGAGTAAAAAGAAATTATTGCAAACTAACCCTATGTACTTTTTATAAAATGC                                                                                    |
| Nrf2 3'UTR (WT)  | Reverse | GGCCGCATTATATAAAAAAGTACATAGTGGTTAGTTTGCATAAATTTCTTTTAC                                                                                   |
| Nrf2 3'UTR (MUT) | Forward | TCGAGTAAAAAGAAATTATTGCAAACTATCGATTCTGTACTTTTTATAAAATGC                                                                                   |
| Nrf2 3'UTR (MUT) | Reverse | GGCCGCATTATATAAAAAAGTACAGAATCGATAGTTTGCATAAATTTCTTTTAC                                                                                   |
| miR-140-5p (o/e) | Forward | CCGGCTACCATAGGGTAAAACCACTGCTCGAGCAGTGGTTTTACCCTATGGTAGTTTTG                                                                              |
| miR-140-5p (o/e) | Reverse | AATTCAAAAACTACCATAGGGTAAAACCACTGCTCGAGCAGTGGTTTTACCCTATGGTAG                                                                             |
| TuD-NC           | Forward | 5'CCGGTGACGGCGCTAGGATCATCAACAAGCCACAACGAATCTCTATATCATCAAGTATTCTGGTCACAGAATACAACAAGCCACAACGAATCTCTATATCATCAAGATGATCCTAGCGCCGTCTTTTTTG-3'  |
| TuD-NC           | Reverse | 5'AATTCAAAAAAGACGGCGCTAGGATCATCTTGATGATATAGAGATTCGTTGTGGCTTGTGTATTCTGTGACCAGAATACTTGATGATATAGAGATTCGTTGTGGCTTGTGATGATCCTAGCGCCGTCA -3'   |
| TuD miR-140-5p   | Forward | 5'CCGGTGACGGCGCTAGGATCATCAACCTACCATAGGGTATCTAAAACCACTGCAAGTATTCTGGTCACAGAATACAACCTACCATAGGGTATCTAAAACCACTGCAAGATGATCCTAGCGCCGTCTTTTTTG3' |
| TuD miR-140-5p   | Reverse | 5'AATTCAAAAAAGACGGCGCTAGGATCATCTTGCAGTGGTTTTAGATACCCTATGGTAGGTTGTATTCTGTGACCAGAATACTTGCAGTGGTTTTAGATACCCTATGGTAGGTTGATGATCCTAGCGCCGTCA3  |
| shHif1 $\alpha$  | Forward | CCGGCCAGTTATGATTGTGAAGTTACTCGAGTAACTTCACAATCATAACTGGTTTTTG                                                                               |
| shHif1 $\alpha$  | Reverse | AATTCAAAAACCAAGTTATGATTGTGAAGTTACTCGAGTAACTTCACAATCATAACTGG                                                                              |

**Table S3. List of antibodies**

| <b>Antibody</b> | <b>Catalogue no.</b> | <b>Company</b>  | <b>Species</b> |
|-----------------|----------------------|-----------------|----------------|
| Hif1 $\alpha$   | sc-13515             | Santa Cruz      | Mouse          |
| Nrf2            | sc-722               | Santa Cruz      | Rabbit         |
| Keap1           | #8047S               | CST             | Rabbit         |
| HO-1            | 5853S                | CST             | Rabbit         |
| PCNA            | sc-25280             | Santa Cruz      | Mouse          |
| AKT1            | Sc-5298              | Santa Cruz      | Mouse          |
| pAKT1/2/3       | sc-16646-R           | Santa Cruz      | Rabbit         |
| ERK1            | sc-94                | Santa Cruz      | Rabbit         |
| pERK1/2         | sc-7383              | Santa Cruz      | Mouse          |
| VEGF            | sc-7269              | Santa Cruz      | Mouse          |
| COX-2           | Sab2500267           | Sigma           | Goat           |
| Vimentin        | AB1620               | Merck Millipore | Goat           |
| Caspase3        | #9668                | CST             | Mouse          |
| Caspase7        | #9492                | CST             | Rabbit         |
| Caspase9        | #9508                | CST             | Mouse          |
| PARP            | #9542                | CST             | Rabbit         |
| BID             | sc-11423             | Santa Cruz      | Rabbit         |
| BAX             | sc-493               | Santa Cruz      | Rabbit         |
| Bcl2            | sc-7382              | Santa Cruz      | Mouse          |
| Slug            | ab-27568             | Abcam           | Rabbit         |
| Twist           | T6451                | Sigma           | Rabbit         |

|                  |         |                |        |
|------------------|---------|----------------|--------|
| $\beta$ -catenin | sc-7963 | Santa Cruz     | Mouse  |
| E-cadherin       | 610182  | BD Biosciences | Mouse  |
| $\beta$ -tubulin | T8328   | Sigma          | Mouse  |
| GAPDH            | G9545   | Sigma          | Rabbit |
